# Supplementary material for: TiO2—MoS2—PMMA Nanocomposites for an Efficient Water Remediation
Source: MDPI journal article supplement (doi:10.3390/polym16091200), 2024-04-25
Supplement: s1 [file s1]

## Supplementary Information

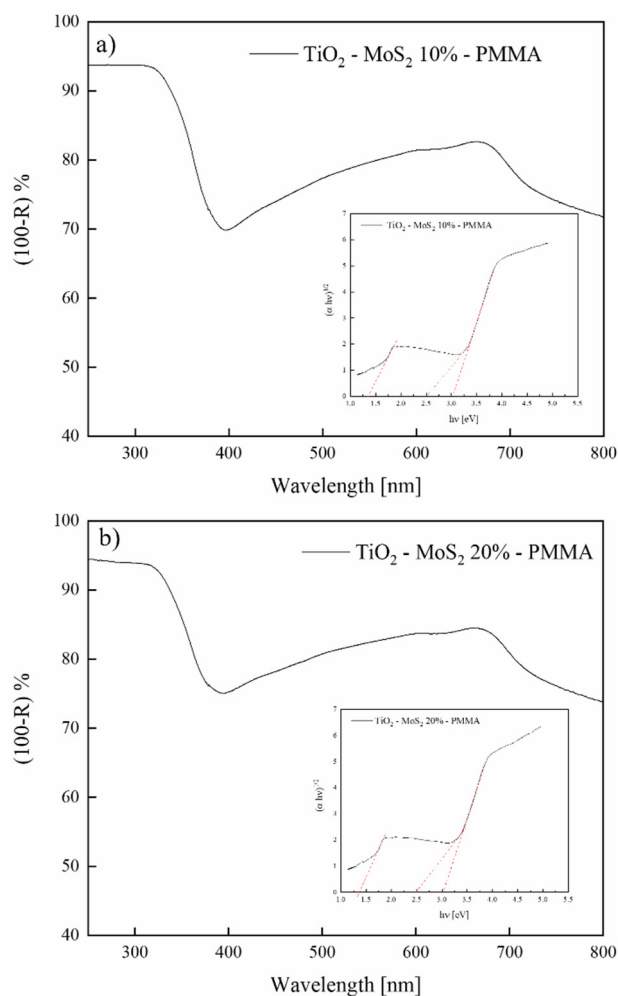

**Figure S1.** (100-Reflectance)% spectra of  $\text{TiO}_2$  - 10%  $\text{MoS}_2$  - PMMA (a), and  $\text{TiO}_2$  - 20%  $\text{MoS}_2$  - PMMA (b) sample. The insets of the figures show the Tauc-plots (continuous line) and the relative fit (dashed line) for all the samples.

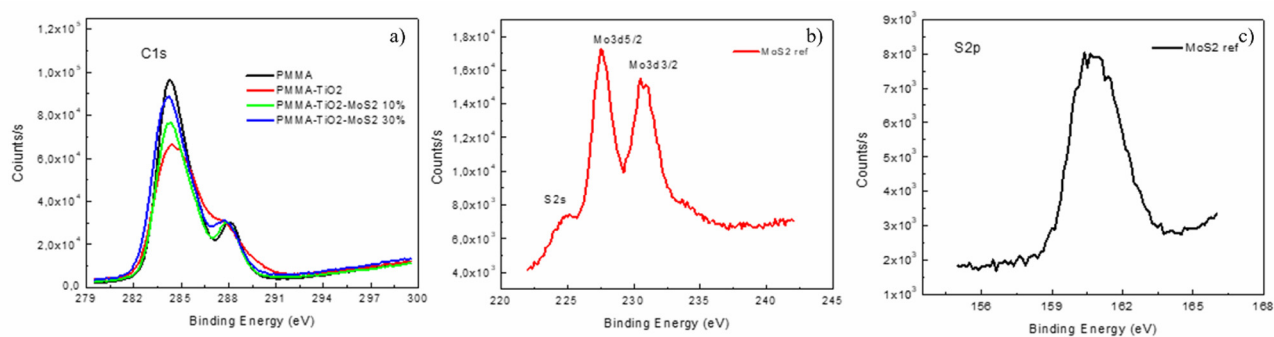

**Figure S2:** XPS spectra recorded for (a) C1s for all studied samples; (b) Mo3d for the commercial  $\text{MoS}_2$ ; (c) S2p for the commercial  $\text{MoS}_2$ .
